# Supplementary material for: Sharp-tip enhanced catalytic CO oxidation by atomically dispersed Pt1/Pt2on a raised graphene oxide platform
Source: Royal Society of Chemistry journal article supplement (doi:10.1039/d0ta04156d), 2020-01-01
Supplement: d0ta04156d1.pdf [file d0ta04156d1.pdf]

## Supporting Information

# Sharp-Tip Enhanced Catalytic CO Oxidation by Atomically Dispersed Pt<sub>1</sub>/Pt<sub>2</sub> on Raised Graphene Oxide Platform

Chuanyi Jia <sup>a,b,‡</sup>, Yujin Zhang <sup>c,‡</sup>, Xijun Wang <sup>b,‡</sup>, Wenhui Zhong <sup>a</sup>, Oleg V. Prezhdo  
<sup>d</sup>, Yi Luo <sup>b</sup>, Jun Jiang <sup>b,\*</sup>

a) Guizhou Provincial Key Laboratory of Computational Nano-material Science,  
Institute of Applied Physics, Guizhou Education University, Guiyang, Guizhou,  
550018, China

b) Hefei National Laboratory for Physical Sciences at the Microscale, iChEM  
(Collaborative Innovation Center of Chemistry for Energy Materials), CAS Center for  
Excellence in Nanoscience, School of Chemistry and Materials Science, University of  
Science and Technology of China, Hefei, Anhui, 230026, China

c) School of Electronic and Information Engineering, Department of Physics, Qilu  
University of Technology, Jinan, Shandong, 250353, China

d) Department of Chemistry, University of Southern California, Los Angeles,  
California, 90089, United States

### Corresponding Author

\* jiangj1@ustc.edu.cn. Phone: +86 551 63600029

‡ The first three authors contributed equally to this work.

## 1. The Convergence Test for DFT, DFT-D2 and DFT-D3 Calculation Methods.

Three different calculation methods (DFT, DFT-D2 and DFT-D3) have been test, as shown in Table S1. Comparing the value of  $E_b(\text{O}_2)$ , we noted that using different vdW (van der Waals) corrections (D2 or D3), the  $E_b(\text{O}_2)$  has very small changes (less than 0.003 eV). However, if we do not use vdW correction (DFT), the changes will become much larger (more than 0.031 eV). The optimized structures in Figure S1 also show that the differences of bond lengths between the DFT and DFT-D2 calculation methods are more significant than the differences between the DFT-D2 and DFT-D3 calculation methods, which further confirm the above conclusion. As a result, the vdW correction is necessary for the two-dimensional system (which is supported by some other DFT calculation works as well<sup>s1,s2</sup>), and a common DFT-D2 method is selected for our calculations.

**Table S1.** Calculated total energies of bare  $\text{Pt}_1\text{O}_2/\text{Gr}$  ( $E(\text{Pt}_1\text{O}_2/\text{Gr})$ ) and  $\text{O}_2+\text{Pt}_1\text{O}_2/\text{Gr}$  ( $E(\text{O}_2-\text{Pt}_1\text{O}_2/\text{Gr})$ ), and the binding energies of  $\text{O}_2$  ( $E_b(\text{O}_2)$ ) using different calculation methods.

|                                                           | <i>DFT</i> | <i>DFT-D2</i> | <i>DFT-D3</i> |
|-----------------------------------------------------------|------------|---------------|---------------|
| $E(\text{Pt}_1\text{O}_2/\text{Gr})/\text{eV}$            | -676.284   | -680.774      | -679.134      |
| $E(\text{O}_2-\text{Pt}_1\text{O}_2/\text{Gr})/\text{eV}$ | -688.597   | -693.054      | -691.417      |
| $E_b(\text{O}_2)/\text{eV}$                               | -2.456     | -2.422        | -2.425        |

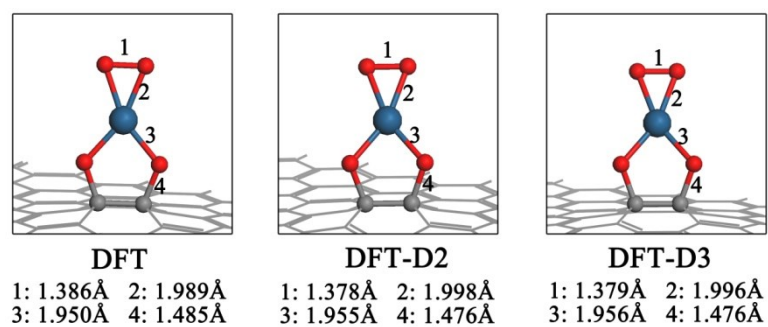

**Figure S1.** The optimized structures of O<sub>2</sub> on Pt<sub>1</sub>O<sub>2</sub>/Gr using different calculation methods (DFT, DFT-D2, and DFT-D3). Dark blue, gray, and red spheres represent Pt, C, and O atoms, respectively.

## 2. The Detailed Calculation Steps for the Reaction Paths.

The calculation steps are as follows (taking the CO+O<sub>2</sub> reaction path on Pt<sub>1</sub>/Gr as an example): (1) calculate various initial binding states of co-adsorbed CO+O<sub>2</sub> on Pt<sub>1</sub>/Gr, and select the most stable one (Pt<sub>1</sub>/Gr-CO-O<sub>2</sub>-1), as shown in Figure S2; (2) based on the most stable initial binding states in step (1), design various intermediates/final states; (3) optimize the designed states in step-(2), and select the most stable one; (4) based on the most stable initial binding states and intermediates/final states in step (1) and (3), design various reaction paths (insert different images during CI-NEB calculations); (5) select the most reasonable reaction path and transition state in step (4) to draw the PES (potential energy surface); (6) find the rate limiting step and calculate the energy barrier.

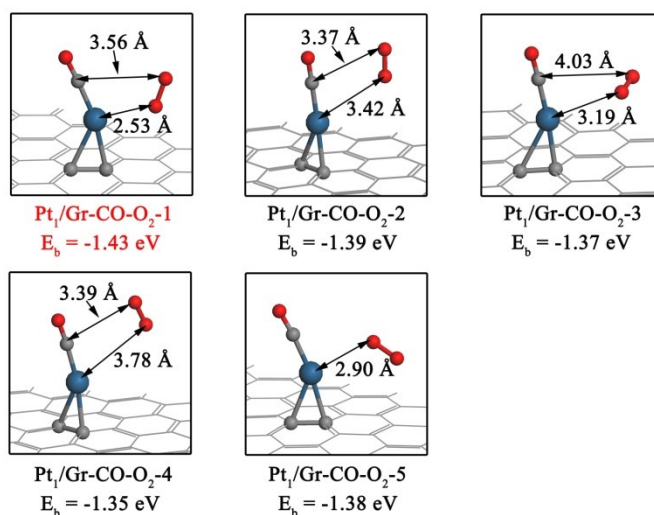

**Figure S2.** The optimized structures and binding energies of the adsorption states for CO+O<sub>2</sub> on Pt<sub>1</sub>/Gr. See Figure S1 for color coding.

### 3. Calculation Details for the Ratio between the Coverage of CO and O<sub>2</sub>.

The ratio between the coverage of CO and O<sub>2</sub> is calculated as follows:

The adsorption of CO and O<sub>2</sub> proceeds as <sup>s3</sup>:

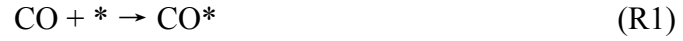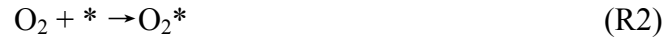

When the reactions R1 and R2 are in equilibrium, the forward and reverse rates are equal:

$$k_1^+ p(\text{CO})\theta^* = k_1^- \theta_{\text{CO}} \quad (1)$$

$$\theta_{\text{CO}} = K_1 p(\text{CO})\theta^* \quad (2)$$

$$k_2^+ p(\text{O}_2)\theta^* = k_2^- \theta_{\text{O}_2} \quad (3)$$

$$\theta_{\text{O}_2} = K_2 p(\text{O}_2)\theta^* \quad (4)$$

$k_i^+$  and  $k_i^-$  are the forward and backward rate constants for Ri respectively,

$K_i$  is the rate constant, which is equal to the ratio of  $k_i^+$  and  $k_i^-$ ,

$p(\text{CO})$  and  $p(\text{O}_2)$  are the partial pressures of CO and O<sub>2</sub>:  $p(\text{CO})= 0.01$  bar and  $p(\text{O}_2) = 0.21$  bar at room temperature,

$\theta^*$  represents the coverages of CO and O<sub>2</sub> in terms of free sites.

The coverages of  $\theta_{\text{O}_2}$ ,  $\theta_{\text{CO}}$ , and  $\theta^*$  follow the rule:

$$\theta_{\text{O}_2} + \theta_{\text{CO}} + \theta^* = 1 \quad (5)$$

The rate constant  $K_1$  is given by:

$$K_1 = e^{\frac{-\Delta G_1}{kT}} \quad (6)$$

In this equation,  $\Delta G_1$  is the change of Gibb's free energy in R1 which is calculated by <sup>s4</sup>:

$$\Delta G_1 = \Delta E_1 + \Delta ZPE_1 - T\Delta S_1 \quad (7)$$

where,  $\Delta E_1$  is the binding energy of CO;  $\Delta ZPE_1$  is the change in zero-point energy during CO adsorption;  $T$  is the temperature ( $T = 298.15$  K),  $\Delta S_1$  is the change in entropy during CO adsorption;  $k$  is the Boltzmann constant.

The rate constant  $K_2$  is given by:

$$K_2 = e^{\frac{-\Delta G_2}{kT}} \quad (8)$$

In this equation,  $\Delta G_2$  is the change of Gibb's free energy in R2 which is calculated by:

$$\Delta G_2 = \Delta E_2 + \Delta ZPE_2 - T\Delta S_2 \quad (9)$$

where,  $\Delta E_2$  is the binding energy of O<sub>2</sub>;  $\Delta ZPE_2$  is the change in zero-point energy during O<sub>2</sub> adsorption;  $\Delta S_2$  is the change in entropy during O<sub>2</sub> adsorption.

Finally, the  $\frac{\theta_{CO}}{\theta_{O_2}}$  is calculated as:

$$\frac{\theta_{CO}}{\theta_{O_2}} = \frac{K_1 p(CO)}{K_2 p(O_2)} \quad (10)$$

By evaluating the competition between CO and O<sub>2</sub> in occupying catalytic sites, the ratio  $\frac{\theta_{CO}}{\theta_{O_2}}$  is more direct and therefore better in reflecting the CO poisoning effect than the difference in the binding energies/Gibbs free binding energies of CO and O<sub>2</sub>. To connect the ratio  $\frac{\theta_{CO}}{\theta_{O_2}}$  with the Gibbs free binding energies (for easy comparison), we have also included the Boltzmann constant  $k$ , temperature  $T$ , and Napierian logarithm

in eq 2 in the paper. Since  $\Gamma_o$  directly represents the different abilities in capturing CO and O<sub>2</sub> by catalyst, we could name it as “CO poisoning rate”.

#### 4. Binding Structures of the Pt<sub>1</sub>O<sub>2</sub> Cluster at the Ortho, Meta, and Para Positions of a Carbon Ring on Graphene.

The calculation results show that the Pt<sub>1</sub>O<sub>2</sub> cluster can only be adsorbed on the Ortho-position of the ring. When Pt<sub>1</sub>O<sub>2</sub> cluster is adsorbed on the Meta and Para positions, it can be easily desorbed and leave far away from the surface, as shown in Figure S1.

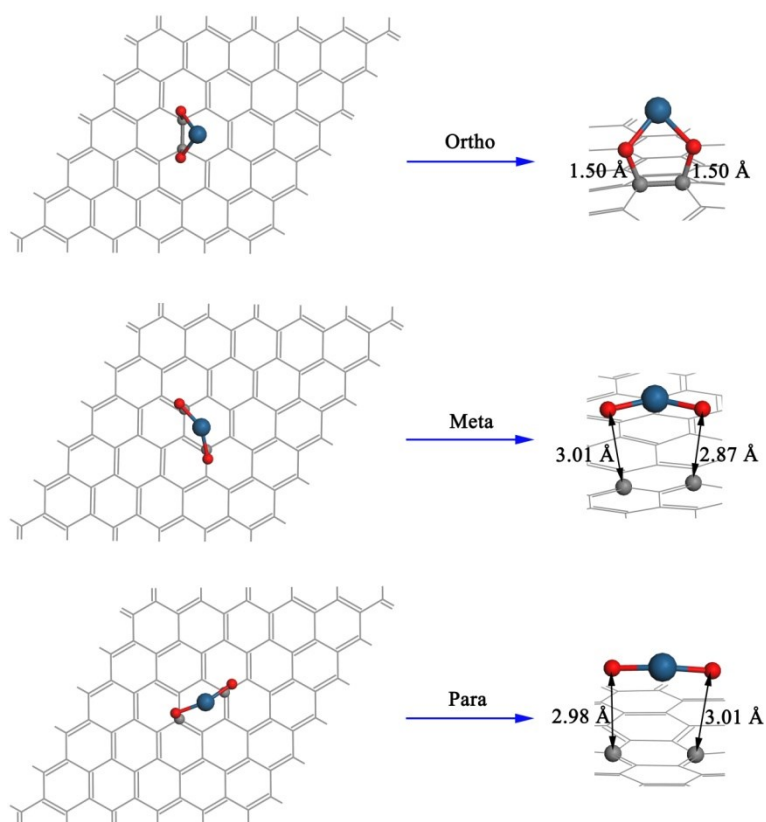

**Figure S3.** Binding structures of the Pt<sub>1</sub>O<sub>2</sub> cluster at the Ortho, Meta, and Para positions of the ring. Left: top-view; Right: side-view. See Figure S1 for color coding.

## 5. Binding Structures and Corresponding DDEC Charges of the Pt<sub>1</sub>/Pt<sub>2</sub>-tip on Pristine/Oxidized Graphene.

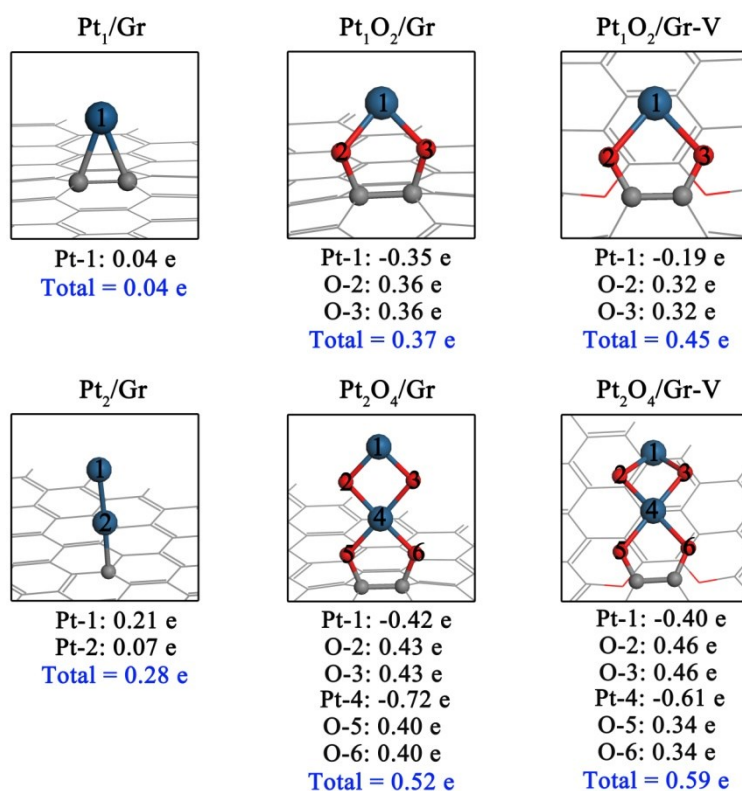

**Figure S4.** Binding structures and their corresponding DDEC charges of the Pt<sub>1</sub>/Pt<sub>2</sub>-tip on Pristine/Oxidized graphene. See Figure S1 for color coding.



## 6. The Optimized Structures and Binding Energies of the Adsorption States in

Figure 2.

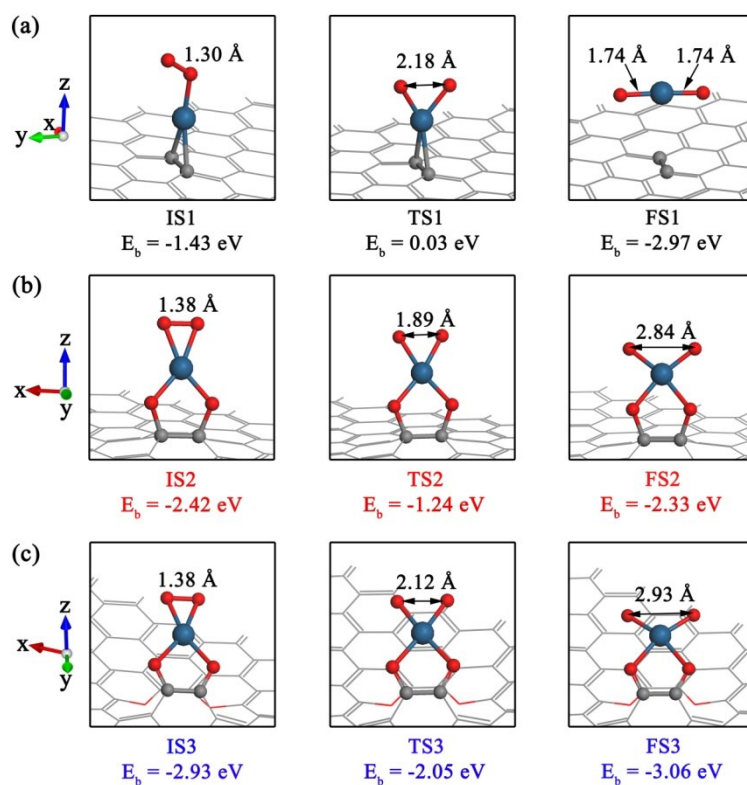

**Figure S5.** The optimized structures and binding energies of the adsorption states for the  $O_2$  activation processes in Figure 2-(a). **(a)**, **(b)**, and **(c)** represent the states of  $O_2$  on Pt<sub>1</sub>/Gr, Pt<sub>1</sub>O<sub>2</sub>/Gr, and Pt<sub>1</sub>O<sub>2</sub>/Gr-V, respectively. See Figure S1 for color coding.

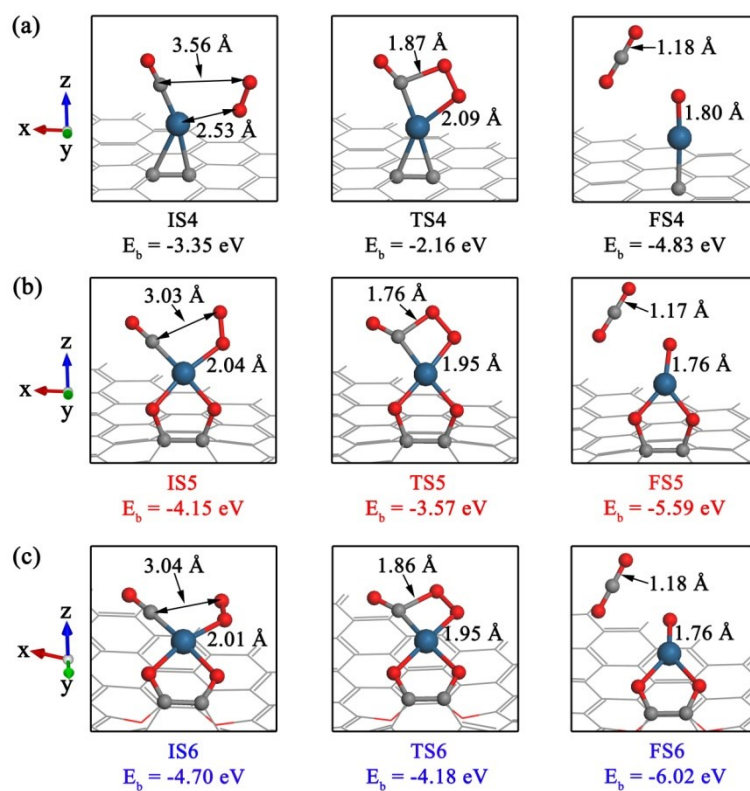

**Figure S6.** The optimized structures and binding energies of the adsorption states for the CO+O<sub>2</sub> processes in Figure 2-(b). **(a)**, **(b)**, and **(c)** represent the states of CO+O<sub>2</sub> on Pt<sub>1</sub>/Gr, Pt<sub>1</sub>O<sub>2</sub>/Gr, and Pt<sub>1</sub>O<sub>2</sub>/Gr-V, respectively. See Figure S1 for color coding.

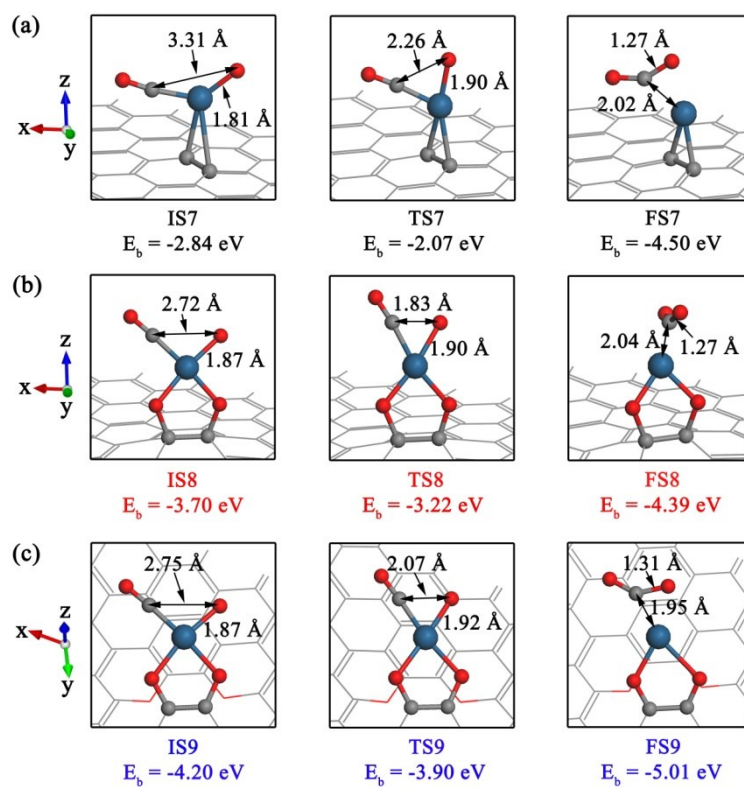

**Figure S7.** The optimized structures and binding energies of the adsorption states for the CO+O processes in Figure 2-(c). **(a)**, **(b)**, and **(c)** represent the states of CO+O on Pt<sub>1</sub>/Gr, Pt<sub>1</sub>O<sub>2</sub>/Gr, and Pt<sub>1</sub>O<sub>2</sub>/Gr-V, respectively. See Figure S1 for color coding.

## 7. The Optimized Structures and Binding Energies of CO on the Pristine/Oxidized Graphene Supported Pt sites.

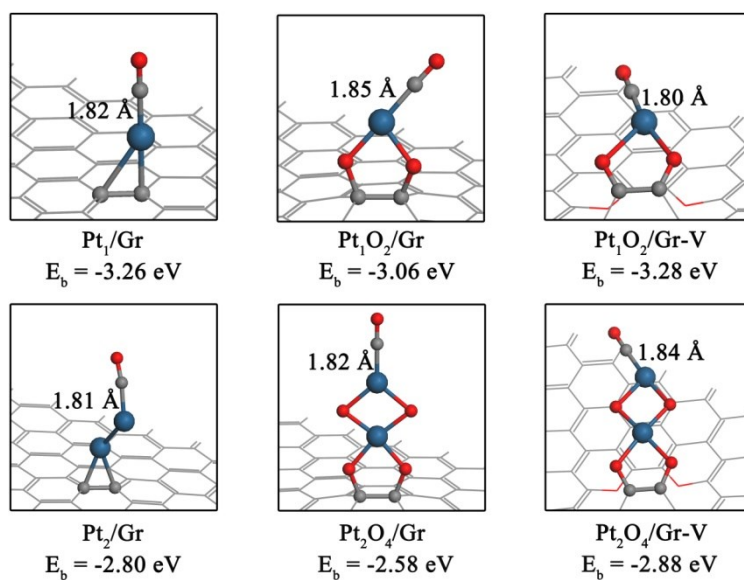

**Figure S8.** The optimized structures and binding energies of CO on the pristine/oxidized graphene supported Pt sites. See Figure S1 for color coding.

## 8. The Adsorption Trend of $2\text{CO}+\text{O}_2$ on $\text{Pt}_1\text{O}_2/\text{Gr}$ .

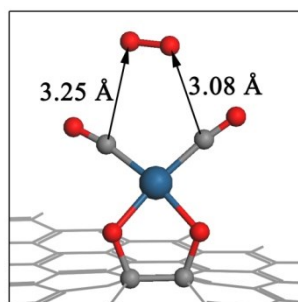

**Figure S9.** The adsorption trend of  $2\text{CO}+\text{O}_2$  on  $\text{Pt}_1\text{O}_2/\text{Gr}$ . See Figure S1 for color coding.

**9. The Optimized Structures and Relative Energies of the Pt<sub>1</sub>O<sub>2</sub>/Gr Catalysts with the Oxidized Ortho and Meta Carbon Vacancies.**

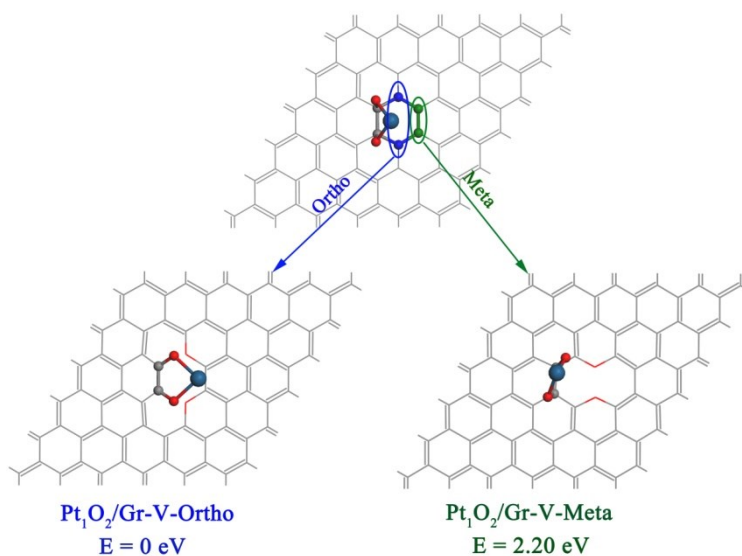

**Figure S10.** The optimized structures and relative energies of the Pt<sub>1</sub>O<sub>2</sub>/Gr catalysts with the oxidized Ortho and Meta carbon vacancies. Blue spheres: oxidized Ortho carbon vacancies; green spheres: oxidized Meta carbon vacancies; other atoms are the same as in Figure S1.

## 10. The Binding Structures of the $\text{Pt}_2\text{O}_4$ Cluster at the Ortho, Meta, and Para Positions of a Carbon Ring on Graphene.

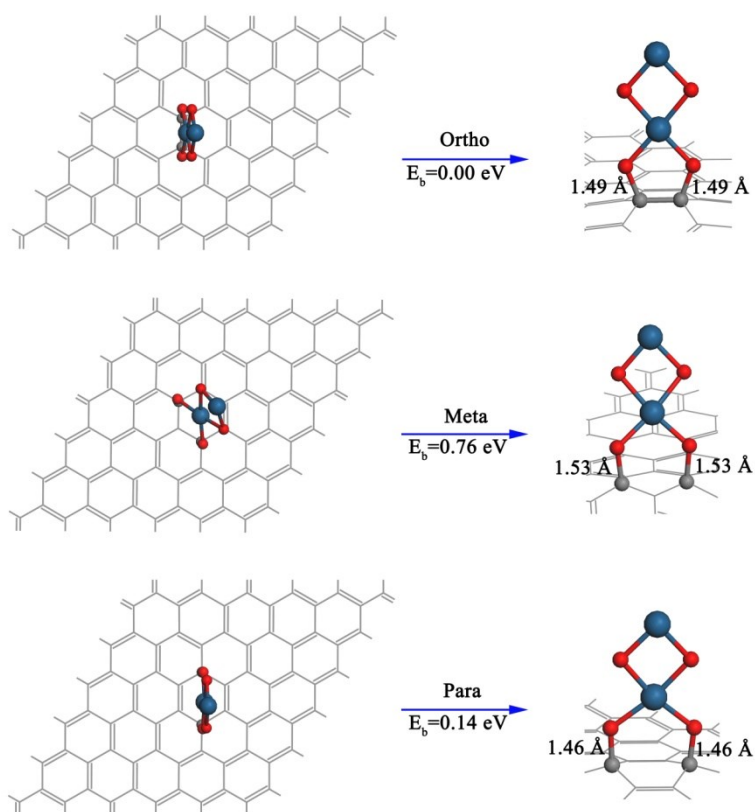

**Figure S11.** The binding structures and relative binding energies of the  $\text{Pt}_2\text{O}_4$  cluster at the Ortho, Meta, and Para positions of the ring. Left: top-view; Right: side-view.

See Figure S1 for color coding.

## 11. The Optimized Structures and Binding Energies of the Adsorption States in

Figure 6.

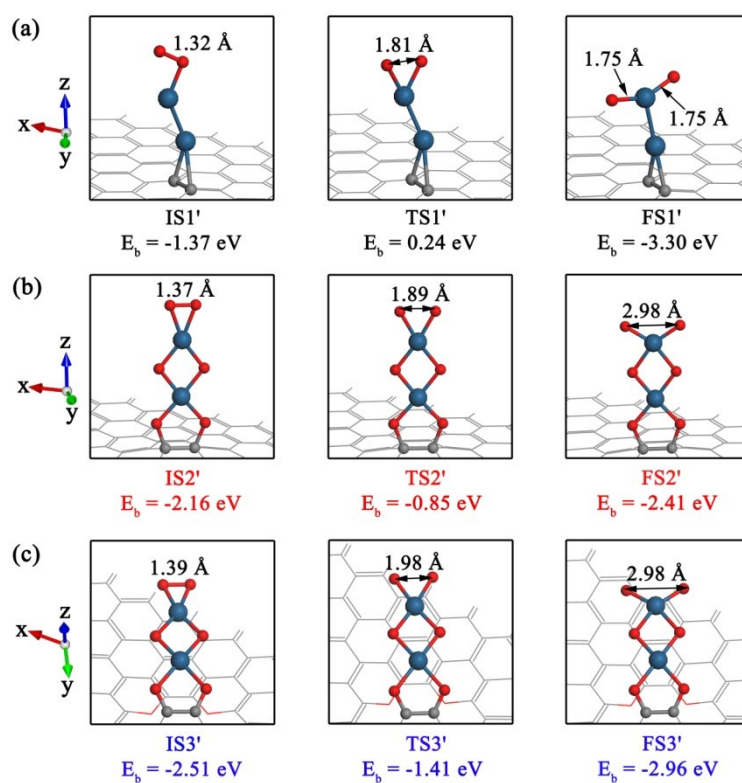

**Figure S12.** The optimized structures and binding energies of the adsorption states for the  $O_2$  activation processes in Figure6-(a). (a), (b), and (c) represent the states of  $O_2$  on Pt<sub>2</sub>/Gr, Pt<sub>2</sub>O<sub>4</sub>/Gr, and Pt<sub>2</sub>O<sub>4</sub>/Gr-V, respectively. See Figure S1 for color coding.



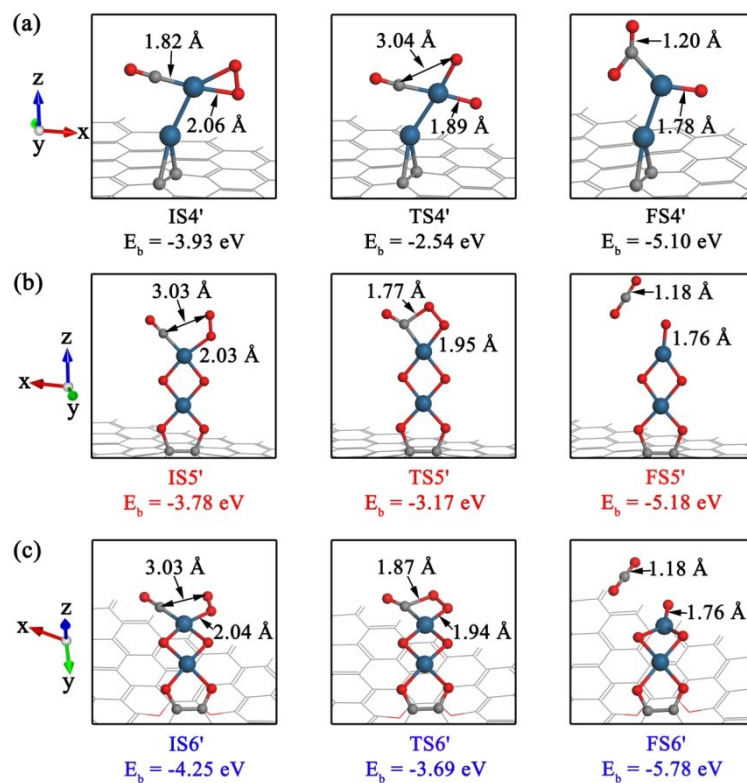

**Figure S13.** The optimized structures and binding energies of the adsorption states for the CO+O<sub>2</sub> processes in Figure 6-(b). **(a)**, **(b)**, and **(c)** represent the states of CO+O<sub>2</sub> on Pt<sub>2</sub>/Gr, Pt<sub>2</sub>O<sub>4</sub>/Gr, and Pt<sub>2</sub>O<sub>4</sub>/Gr-V, respectively. See Figure S1 for color coding.

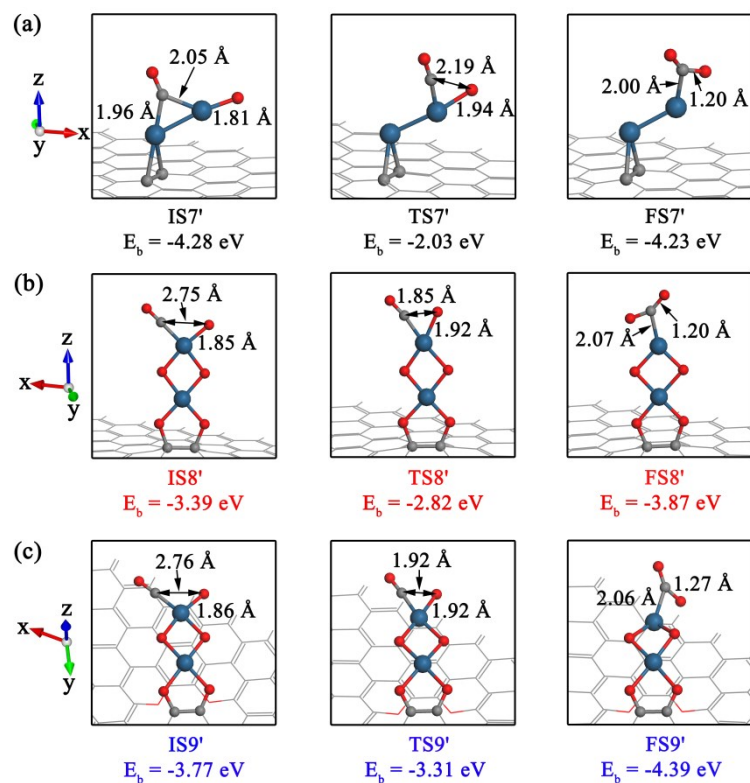

**Figure S14.** The optimized structures and binding energies of the adsorption states for the CO+O processes in Figure 6-(c). **(a)**, **(b)**, and **(c)** represent the states of CO+O on Pt<sub>2</sub>/Gr, Pt<sub>2</sub>O<sub>4</sub>/Gr, and Pt<sub>2</sub>O<sub>4</sub>/Gr-V, respectively. See Figure S1 for color coding.

**12. The Optimized Structures and Relative Energies of the Pt<sub>2</sub>O<sub>4</sub>/Gr Catalysts with the Oxidized Ortho and Meta Carbon Vacancies.**

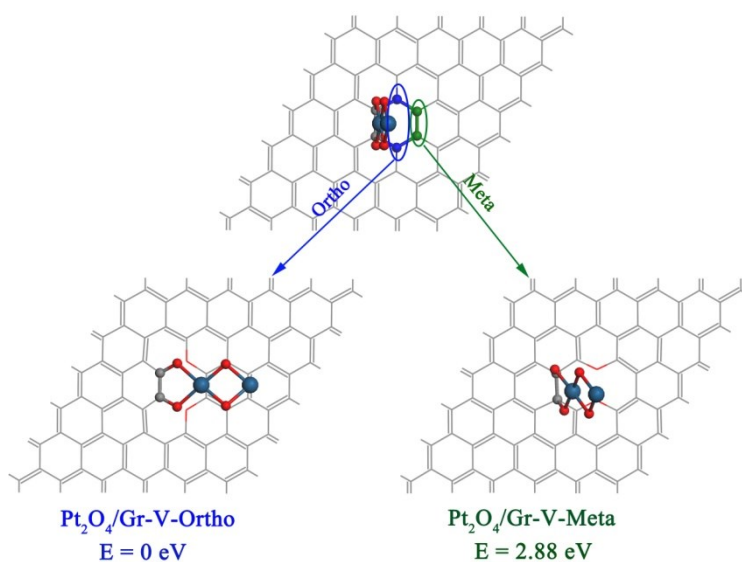

**Figure S15.** The optimized structures and relative energies of the Pt<sub>2</sub>O<sub>4</sub>/Gr catalysts with the oxidized Ortho and Meta carbon vacancies. See Figure S7 for color coding.

## References

- [s1] T. B. Rawal, D. Le and T. S. Rahman, *J. Phys. Chem. C*, 2017, **121**, 7282-7293.
- [s2] X. Li, W. Zhong, P. Cui, J. Li and J. Jiang, *J. Phys. Chem. Lett.*, 2016, **7**, 1750–1755.
- [s3] S. Sinthika, E. M. Kumar and R. Thapa, *J. Mater. Chem. A*, 2014, **2**, 12812-12820.
- [s4] J. Zhao and Z. Chen, *J. Am. Chem. Soc.*, 2017, **139**, 12480-12487.
